# Supplementary material for: A water-based and metal-free dye solar cell exceeding 7% efficiency using a cationic poly(3,4-ethylenedioxythiophene) derivative
Source: Royal Society of Chemistry journal article supplement (doi:10.1039/c9sc05596g), 2020-01-01
Supplement: c9sc05596g1.pdf [file c9sc05596g1.pdf]

# **A water-based and metal-free dye solar cell exceeding 7% efficiency through a cationic poly(3,4-ethylenedioxythiophene) derivative**

Federico **Bella**,<sup>1,\*</sup> Luca **Porcarelli**,<sup>2,3</sup> Daniele **Mantione**,<sup>4</sup> Claudio **Gerbaldi**,<sup>1</sup>  
Claudia **Barolo**,<sup>5</sup> Michael **Grätzel**,<sup>6</sup> David **Mecerreyes**<sup>3,\*</sup>

- 1) *GAME Lab, Department of Applied Science and Technology – DISAT, Politecnico di Torino, Corso Duca degli Abruzzi 24, 10129 – Torino, Italy*
- 2) *Institute for Frontier Materials, Deakin University, Waurin Ponds VIC 3217 – Geelong, Australia*
- 3) *Polymat, Institute for Polymer Materials, University of the Basque Country UPV/EHU, Joxe Mari Korta Center, Avda. Tolosa 72, 20018 – Donostia-San Sebastian, Spain*
- 4) *Laboratoire de Chimie des Polymères Organiques (LCPO - UMR 5629), Bordeaux INP, Université de Bordeaux, CNRS, 16 Av. Pey-Berland, 33607 – Pessac, France*
- 5) *Department of Chemistry, NIS Interdepartmental Centre and INSTM Reference Centre, Università degli Studi di Torino, Via Pietro Giuria 7, 10125 – Torino, Italy*
- 6) *Laboratory of Photonics and Interfaces, Institut des Sciences et Ingénierie Chimiques, Ecole Polytechnique Fédérale de Lausanne (EPFL), Station 3, 1015 – Lausanne, Switzerland*

**Corresponding authors:** Federico Bella (federico.bella@polito.it, +39 0110904643), David Mecerreyes (david.mecerreyes@ehu.es, +34 943018018).

## **SUPPORTING INFORMATION**

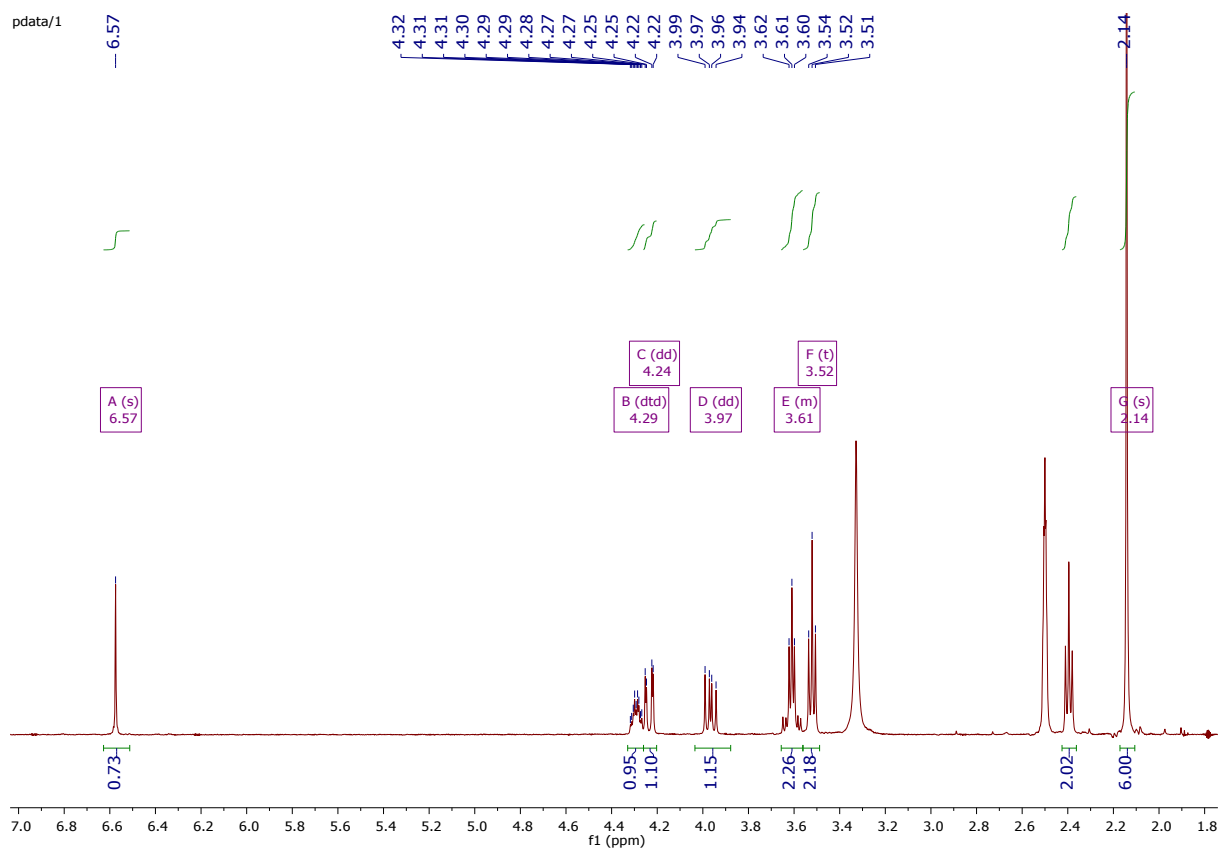

**Figure S1.**  $^1\text{H}$  NMR of **3** in DMSO- $d_6$ .

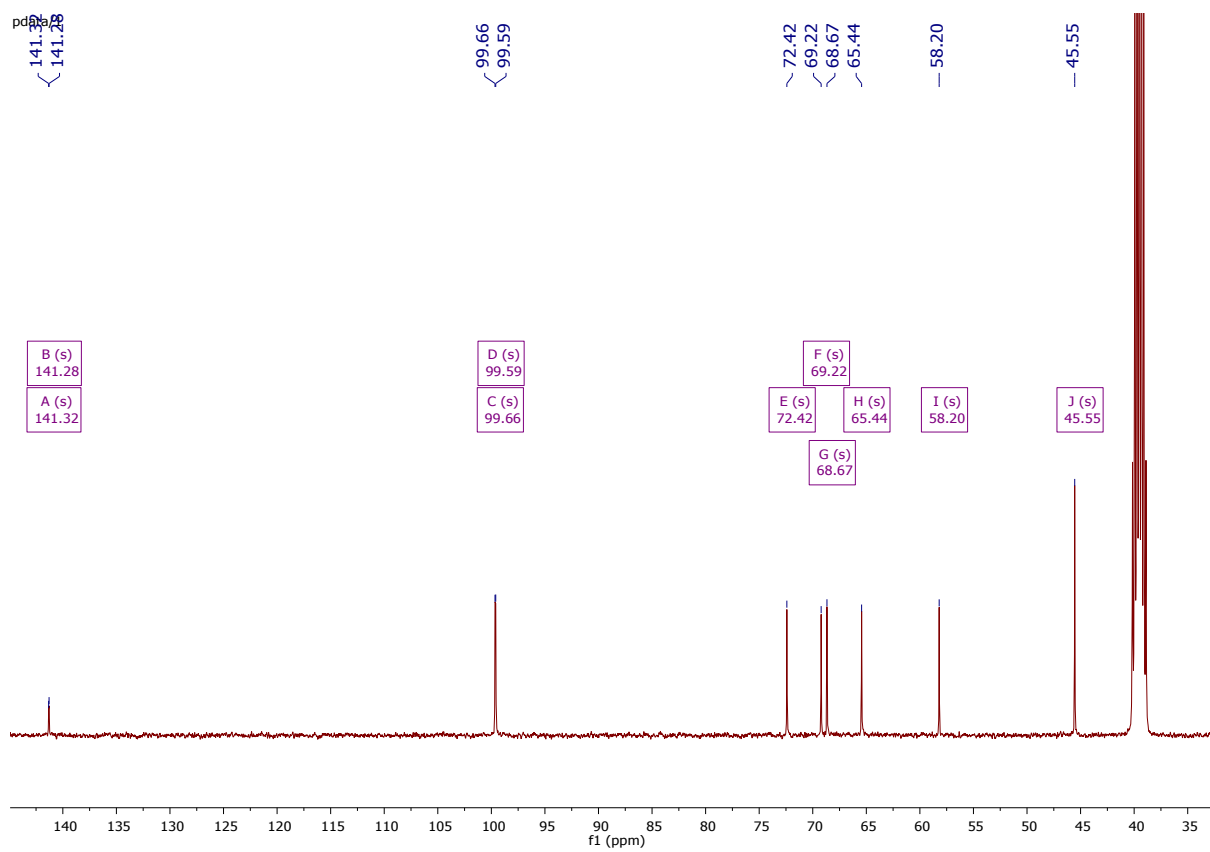

**Figure S2.**  $^{13}\text{C}$  NMR of **3** in DMSO- $d_6$ .

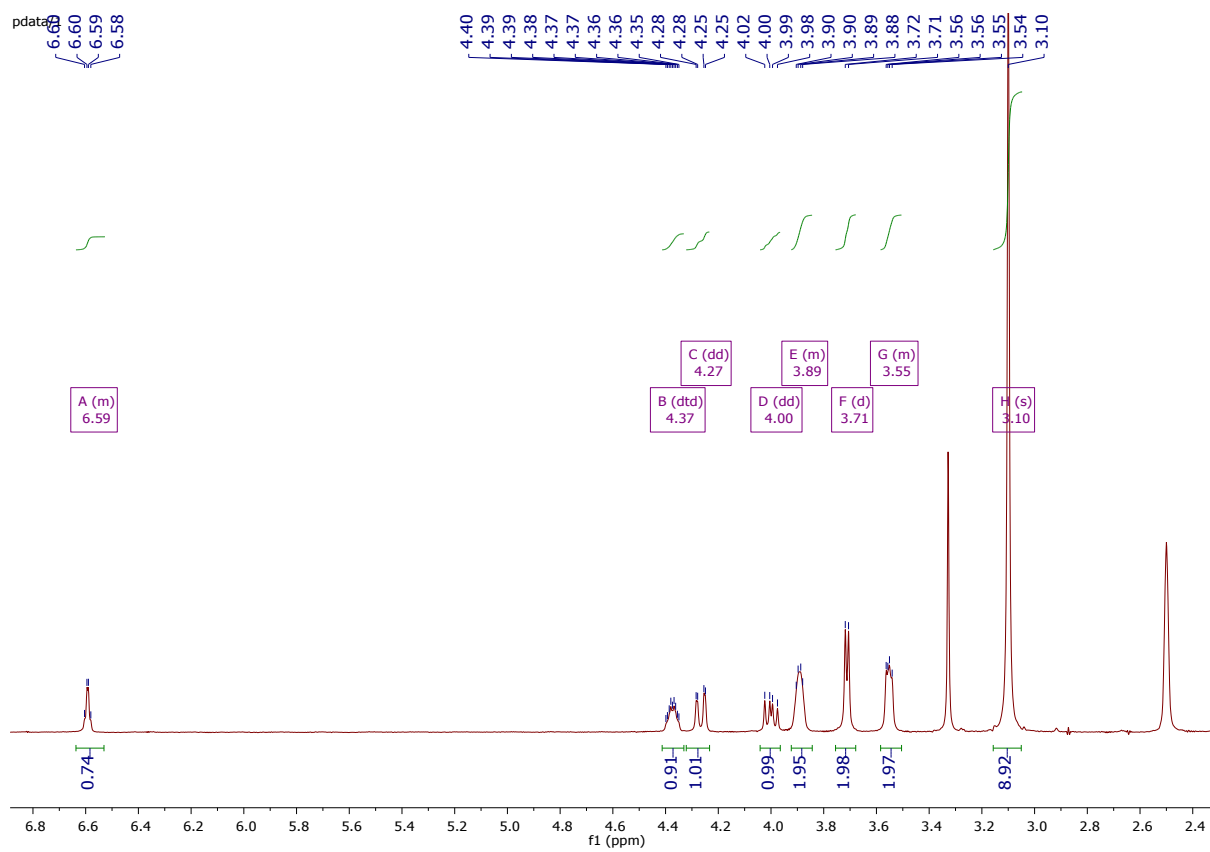

Figure S3.  $^1\text{H}$  NMR of **4** in DMSO- $d_6$ .

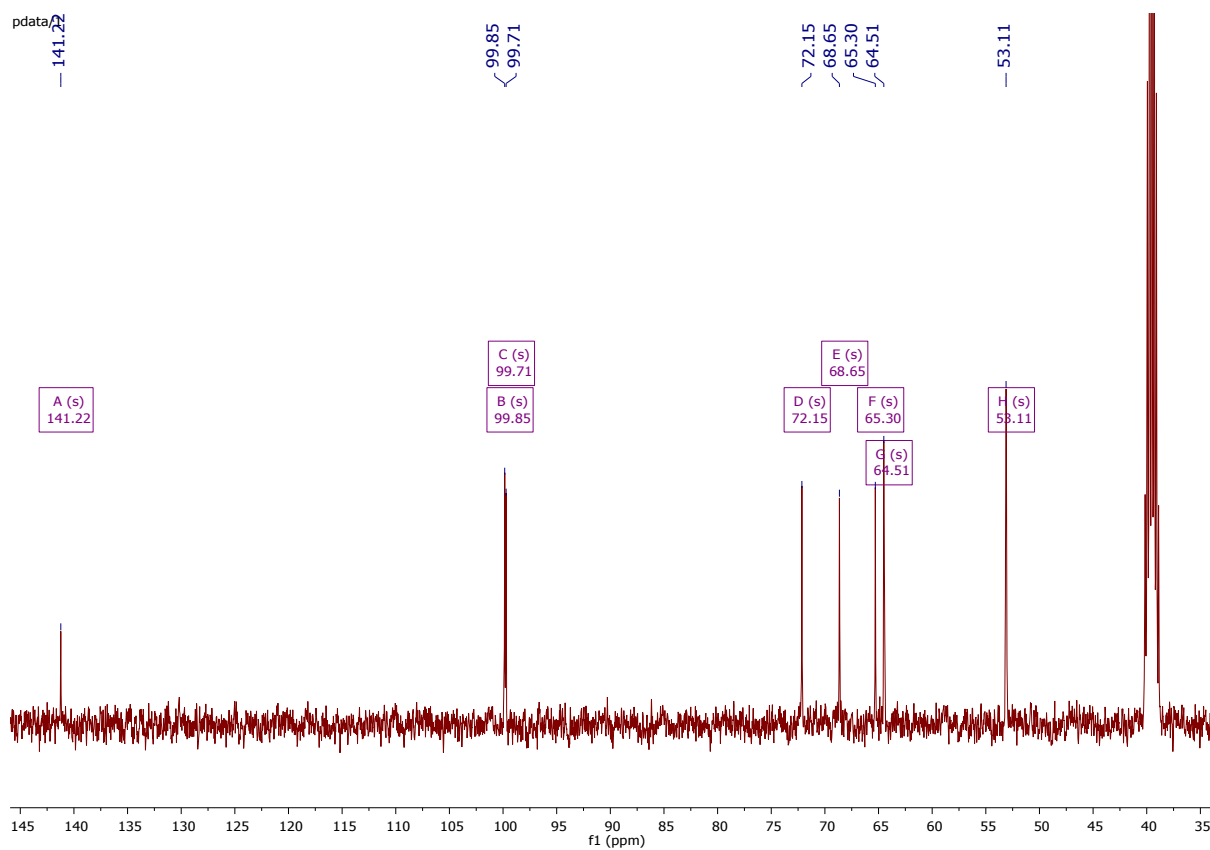

**Figure S4.**  $^{13}\text{C}$  NMR of **4** in DMSO- $d_6$ .

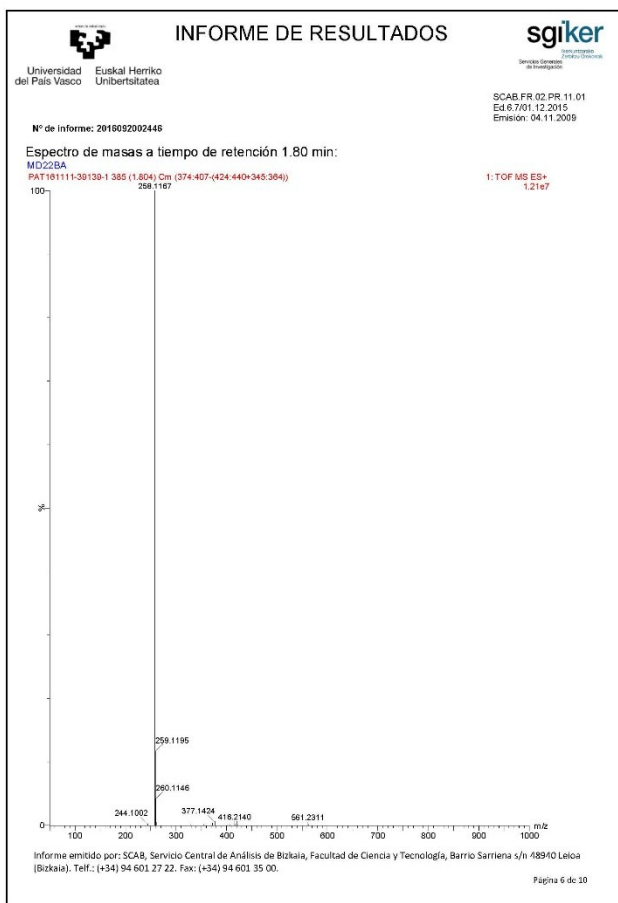

**Figure S5.** HR-MS of **4** in CDCl<sub>3</sub>.

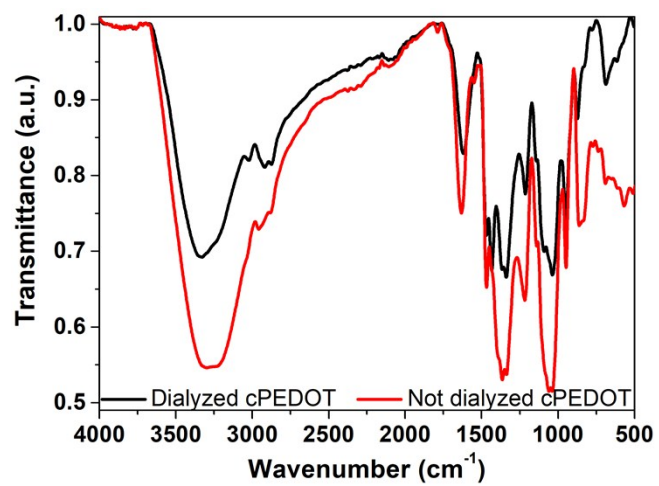

**Figure S6.** FTIR of dialyzed and not-dialyzed cPEDOT.

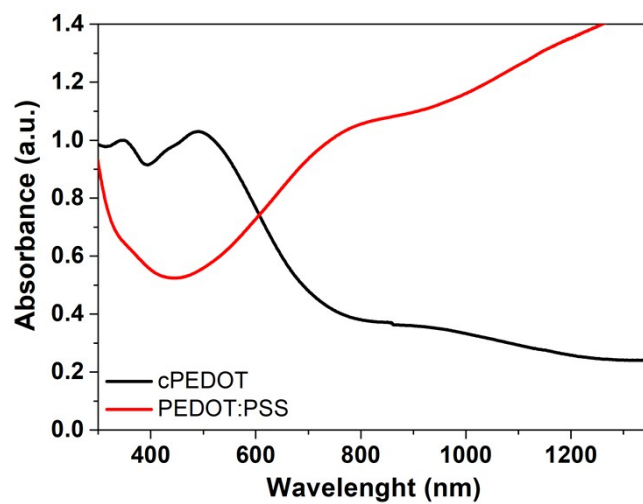

**Figure S7.** UV-Vis-NIR spectrum of cPEDOT and PEDOT:PSS in water.



*Comparison between different experimental setups.* ASCs represent today an extremely challenging topic and the whole experimental approach presents some differences with respect to the traditional DSSC scheme. Indeed, the use of water as a solvent for the electrolyte does not represent a simple substitution of an "inert component" of the photoelectrochemical system; conversely, it profoundly changes numerous aspects affecting device operation, such as the wettability of the electrodes, the redox potential of the active components, the solvent power versus many involved species, etc. To date, a reference cell based on water does not exist in the literature (conversely with respect to, for example, traditional DSSCs, where the  $\text{TiO}_2/\text{TiCl}_4/\text{N719}/\text{I}^-:\text{I}_3^- 10:1/\text{Pt}$  scheme is still widely used and universally recognized to compare newly proposed molecules and materials with a reference benchmark). It is therefore rather difficult to compare outcomes coming from different experimental setups in the ASCs field, as we already published in a review article some years ago [1]. Moreover, some published research works showed that the photovoltaic characterization protocol should be reconsidered as well, since the maximum efficiency for some ASCs was achieved not immediately after cell sealing, but after a few days (even 18 days in some cases [2]). Here we intend to enrich our manuscript by comparing the solar cells data shown in the main text with those obtained following another fabrication protocol, i.e. one of those previously published by our team on liquid ASCs [3] (see **Table S1**). The impact of (among all) photoanode design on cells performance is important and clearly evident in **Table S2**, but the improvement observed when replacing Pt with cPEDOT are still appreciable, in agreement with what reported in the main text.

**Table S1.** Comparison of two different fabrication protocols of ASCs: the one proposed in this work is compared to a previously proposed set-up [1].

| Component              | Previous work                                                                                                                                                                                                                                                                                                 | This work                                                                                                                                                                                                                                                                                                                                                                                                                                                                                                                                                                              |
|------------------------|---------------------------------------------------------------------------------------------------------------------------------------------------------------------------------------------------------------------------------------------------------------------------------------------------------------|----------------------------------------------------------------------------------------------------------------------------------------------------------------------------------------------------------------------------------------------------------------------------------------------------------------------------------------------------------------------------------------------------------------------------------------------------------------------------------------------------------------------------------------------------------------------------------------|
| <b>Glass/FTO</b>       | Sheet resistance $7 \Omega \text{ sq}^{-1}$ . Washed in acetone, ethanol, dried, flash evaporation at $450 \text{ }^\circ\text{C}$ on hot plate.                                                                                                                                                              | Sheet resistance $7 \Omega \text{ sq}^{-1}$ . Washed in Deconex detergent, rinsed in water, ethanol, dried, UV/O <sub>3</sub> -treated.                                                                                                                                                                                                                                                                                                                                                                                                                                                |
| <b>TiO<sub>2</sub></b> | Screen-printing of 1 layer of 18NR-T paste, sintered reaching $480 \text{ }^\circ\text{C}$ in 45 min, final thickness: $6 \mu\text{m}$ . TiCl <sub>4</sub> -treated with a 40 mM solution at $70 \text{ }^\circ\text{C}$ for 30 min, washed in water and sintered at $450 \text{ }^\circ\text{C}$ for 30 min. | 4 nm-thick TiO <sub>2</sub> blocking layer deposited by ALD, screen-printing of 1 layer of DSL 18NR-T paste, screen-printing of 1 layer of HPW-400NRD paste, sintered at $125 \text{ }^\circ\text{C}$ (5 min), $250 \text{ }^\circ\text{C}$ (5 min), $325 \text{ }^\circ\text{C}$ (5 min), $450 \text{ }^\circ\text{C}$ (15 min) and $500 \text{ }^\circ\text{C}$ (15 min), final thickness: $12.5 \mu\text{m}$ . TiCl <sub>4</sub> -treated with a 13 mM solution at $70 \text{ }^\circ\text{C}$ for 30 min, washed in water and sintered at $500 \text{ }^\circ\text{C}$ for 30 min. |
| <b>Dye</b>             | Re-activation of FTO/glass at $450 \text{ }^\circ\text{C}$ for 20 min.<br>Soaking in D131 (0.50 mM in <i>t</i> -BuOH:ACN 1:1, CDCA:Dye 50:1), 5 h at constant $22 \text{ }^\circ\text{C}$ and shaking, then rinsing in acetone.                                                                               | Re-activation of FTO/glass with a hot gun for 30 min at $500 \text{ }^\circ\text{C}$ .<br>Soaking in D149 (0.50 mM in <i>t</i> -BuOH:ACN 1:1, 0.90 mM CDCA), 5 h, then rinsing in acetone.                                                                                                                                                                                                                                                                                                                                                                                             |
| <b>Electrolyte</b>     | NaI 1.0 M and I <sub>2</sub> 10 mM in CDCA-saturated water.                                                                                                                                                                                                                                                   | NaI 1.0 M and I <sub>2</sub> 10 mM in water.                                                                                                                                                                                                                                                                                                                                                                                                                                                                                                                                           |
| <b>Cathode</b>         | From H <sub>2</sub> PtCl <sub>6</sub> 5.0 mM solution, heating up to $400 \text{ }^\circ\text{C}$ on a hot plate.                                                                                                                                                                                             | From H <sub>2</sub> PtCl <sub>6</sub> 5.0 mM solution, heating up to $400 \text{ }^\circ\text{C}$ on a hot plate.                                                                                                                                                                                                                                                                                                                                                                                                                                                                      |
| <b>Assembly</b>        | Surlyn thermoplastic frames, $60 \mu\text{m}$ -thick, hot-pressed.                                                                                                                                                                                                                                            | Surlyn thermoplastic frames, $60 \mu\text{m}$ -thick, hot-pressed. Electrical contact given by ultrasonic soldering of Cerasolzer alloy 246, ARCTOP antireflection film.                                                                                                                                                                                                                                                                                                                                                                                                               |

**Table S2.** Comparison of photovoltaic parameters of ASCs fabricated with the two protocols listed in Table S1.

|                                          | Cathode | $J_{sc}$<br>[mA cm <sup>-2</sup> ] | $V_{oc}$<br>[V] | FF              | PCE<br>[%]      |
|------------------------------------------|---------|------------------------------------|-----------------|-----------------|-----------------|
| <b>Fabrication protocol of this work</b> | Pt      | $11.05 \pm 0.08$                   | $0.66 \pm 0.01$ | $0.68 \pm 0.01$ | $4.95 \pm 0.12$ |
|                                          | cPEDOT  | $12.41 \pm 0.09$                   | $0.69 \pm 0.01$ | $0.77 \pm 0.01$ | $6.64 \pm 0.16$ |
| <b>Fabrication protocol of ref. [1]</b>  | Pt      | $4.05 \pm 0.06$                    | $0.72 \pm 0.01$ | $0.73 \pm 0.02$ | $2.13 \pm 0.07$ |
|                                          | cPEDOT  | $4.51 \pm 0.05$                    | $0.73 \pm 0.01$ | $0.74 \pm 0.01$ | $2.44 \pm 0.06$ |

[1] *Chem. Soc. Rev.* 44 (2015) 3431-3473

[2] *Phys. Chem. Chem. Phys.*, 2014, 16, 19964-19971

[3] *Electrochim. Acta* 302 (2019) 31-37.
